# Supplementary material
Source: publisher figshare collection journal article supplement (https://karger.figshare.com/ndownloader/files/10184694)
Supplement: Supplementary file 1 [file 10184694]

Supplements:

Table 1 : ‘Dose dependence’ relationship between pregnancy and number of sub-endometrial contractions (‘waves’)/ minute

| Number of waves/minute | β | S.E. | Significance | Exp(β) |
| --- | --- | --- | --- | --- |
| 1 | -1.974 | 1.238 | .111 | .139 |
| 2 | -2.079 | 1.323 | .116 | .125 |
| 3 | -3.401 | 1.538 | .027 | .033 |
| Constant | 1.792 | 1.080 | .097 | 6.000 |
